# Supplementary material for: Preparation of an octahedral PtNi/CNT catalyst and its application in high durability PEMFC cathodes
Source: Royal Society of Chemistry journal article supplement (doi:10.1039/c8ra02158a), 2018-01-01
Supplement: c8ra02158a1.pdf [file c8ra02158a1.pdf]

## Supplementary material

### Preparation of Octahedral PtNi/CNTs Catalyst and Application in High Durability for PEMFC Cathode

Jue Wang,<sup>a</sup> Bing Li,<sup>\*a</sup> Daijun Yang,<sup>a</sup> Hong Lv<sup>a</sup> and Cunman Zhang<sup>\*a</sup>

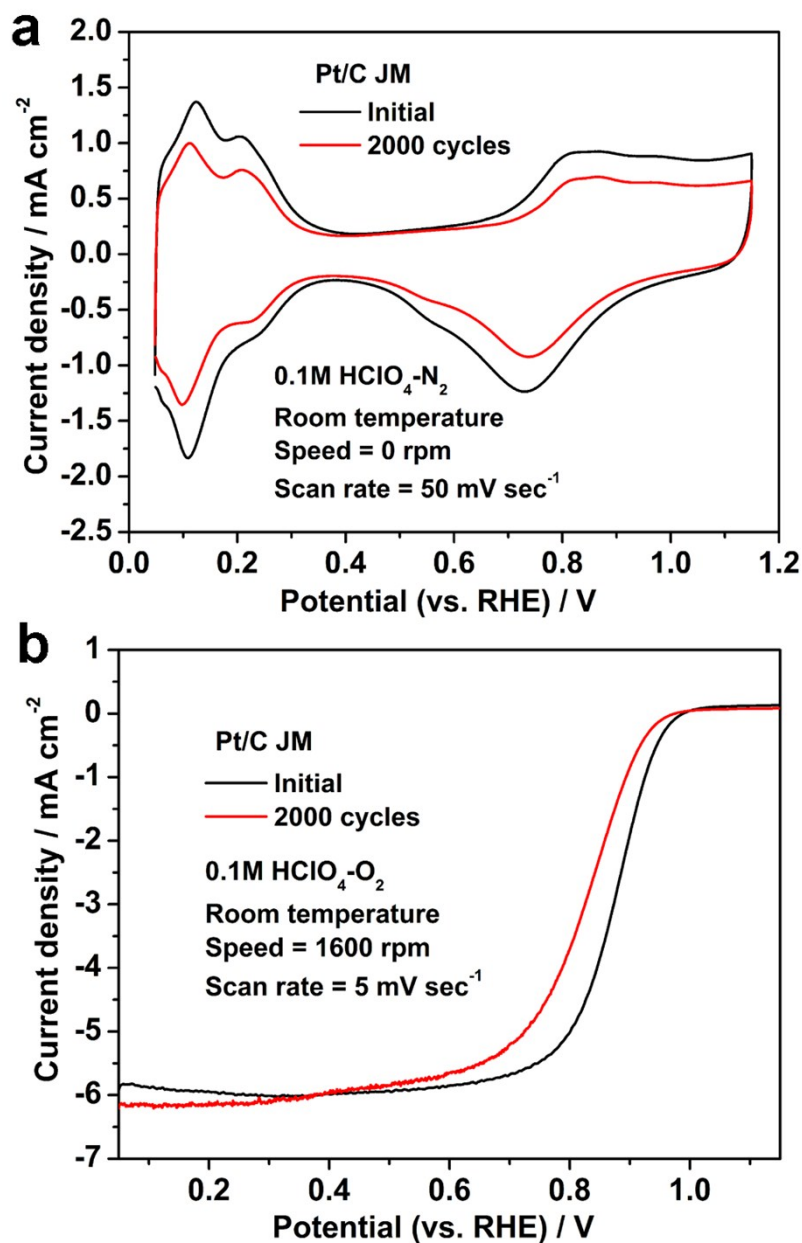

Fig. S1. (a) CV and (b) LSV curves of Pt/C (JM) before and after ADT.

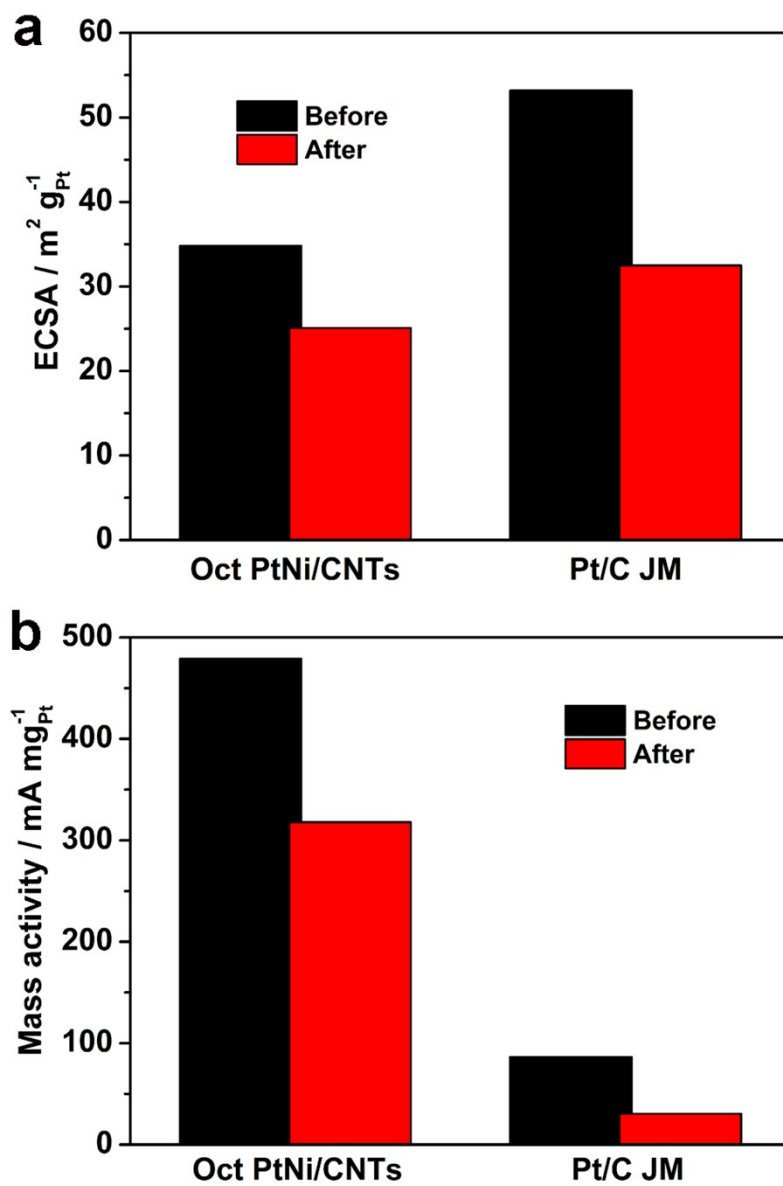

Fig. S2. Comparison of (a) ECSAs and (b) mass activities of octahedral PtNi/CNTs catalyst and Pt/C (JM) before and after ADT.

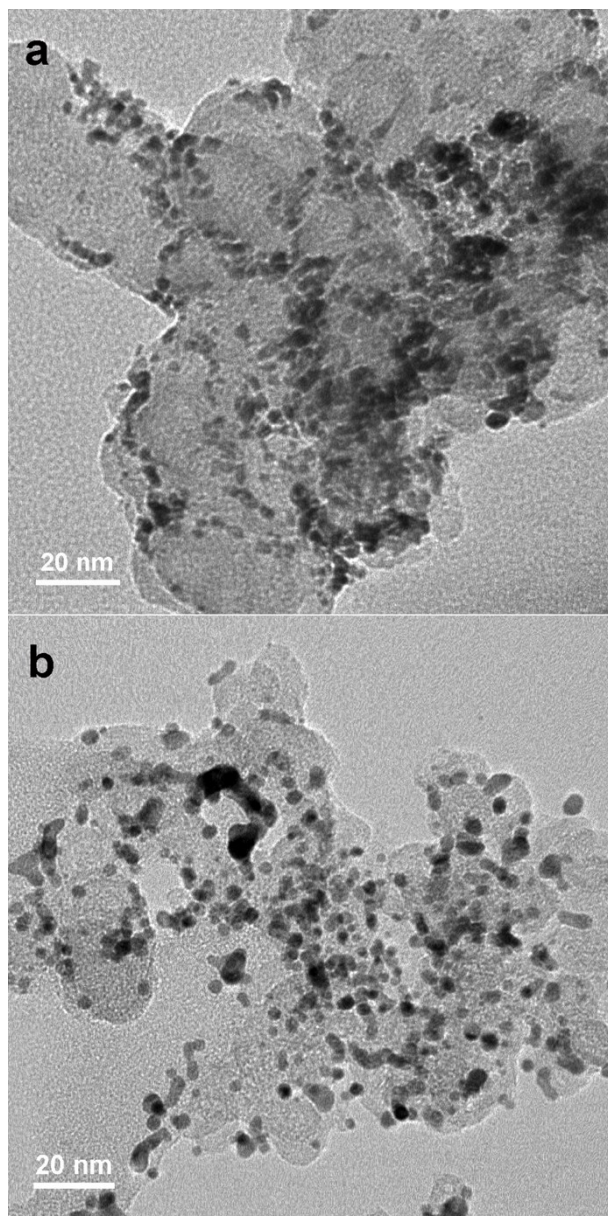

Fig. S3. TEM images of Pt/C (JM) (a) before and (b) after ADT.

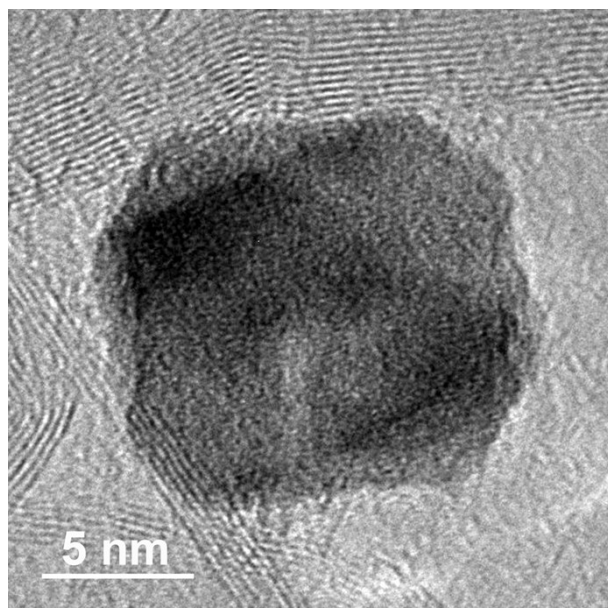

Fig. S4. HRTEM image of an individual PtNi octahedral nanocrystal after ADT.

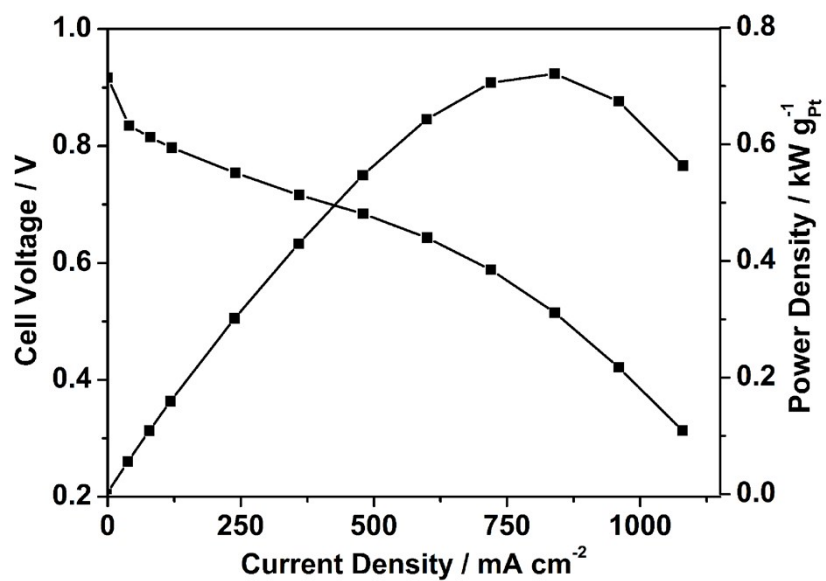

Fig. S5. The polarization curve of the MEA fabricated using octahedral PtNi/CNTs catalyst in cathode measured by the total Pt loading in both electrodes.

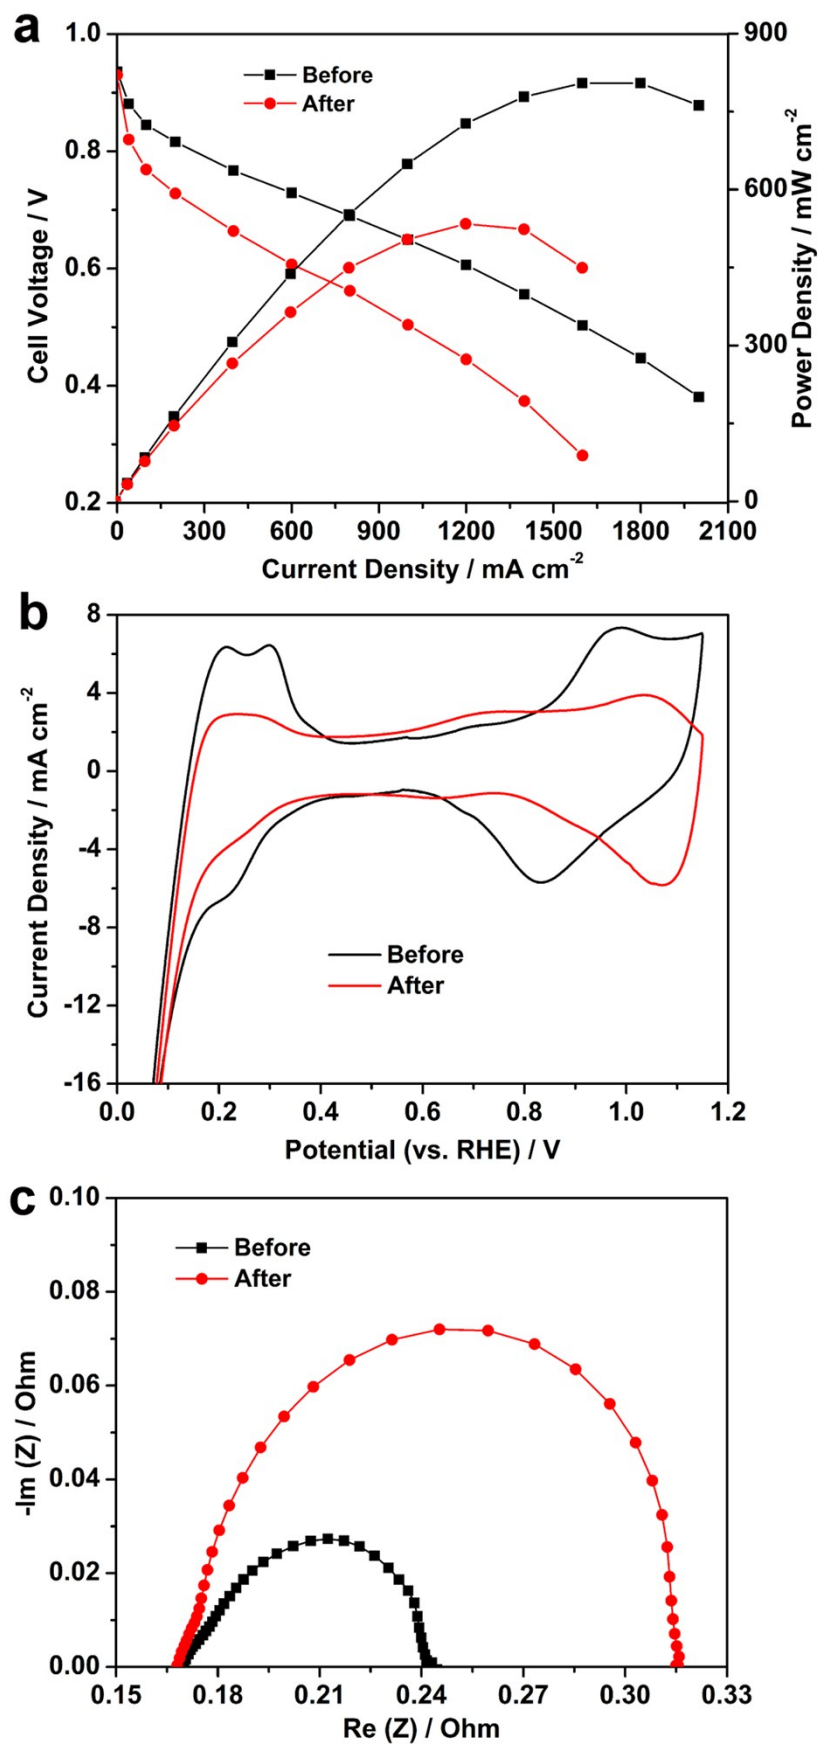

Fig. S6. (a) The polarization curves, (b) in-situ CV curves and (c) EIS of the MEA fabricated using Pt/C (JM)

before and after high potential durability test.

**Table S1.** Crystal sizes and lattice parameters of octahedral PtNi/CNTs catalyst and Pt/C (JM) calculated from XRD data

| Catalyst      | crystal size (nm) | Lattice parameter (Å) |
|---------------|-------------------|-----------------------|
| Oct PtNi/CNTs | 11.6              | 3.726                 |
| Pt/C (JM)     | 3.9               | 3.912                 |
